# Supplementary material for: Fungal Infections Lead to Shifts in Thermal Tolerance and Voluntary Exposure to Extreme Temperatures in Both Prey and Predator Insects
Source: Research Square preprint supplement (doi:10.21203/rs.3.rs-718118/v1), 2021-07-20
Supplement: Supplementary file 1 [file 5c2d77e5701677b9093da167.docx]

Fungal infections lead to shifts in thermal tolerance and voluntary exposure to extreme temperatures in both prey and predator insects

Supplementary information 1

Mitzy F. Porras1*, Gustavo A. Agudelo-Cantero2,3, Geovanni Santiago4, Carlos A. Navas2, Volker Loeschcke3, Jesper Givskov Sørensen3, Edwin G. Rajotte1

1 Department of Entomology, The Pennsylvania State University, 501 ASI Bldg. University Park, PA 16802, USA

2 Department of Physiology, Institute of Biosciences, University of São Paulo, Rua do Matão 101, Tv 14, 05508-090 São Paulo, Brazil

3 Department of Biology – Genetics, Ecology and Evolution, Aarhus University, Ny Munkegade 116, DK-8000 Aarhus C, Denmark

4 Department of Biochemistry, The Pennsylvania State University, 308B Althouse Lab. University Park, PA 16802, USA

*Corresponding author: Mitzy Porras, E-mail: mitzy.porras@gmail.com, +1 765 409 2795, Fax: [814 865-3048](tel:(814)%20865-3048)

**
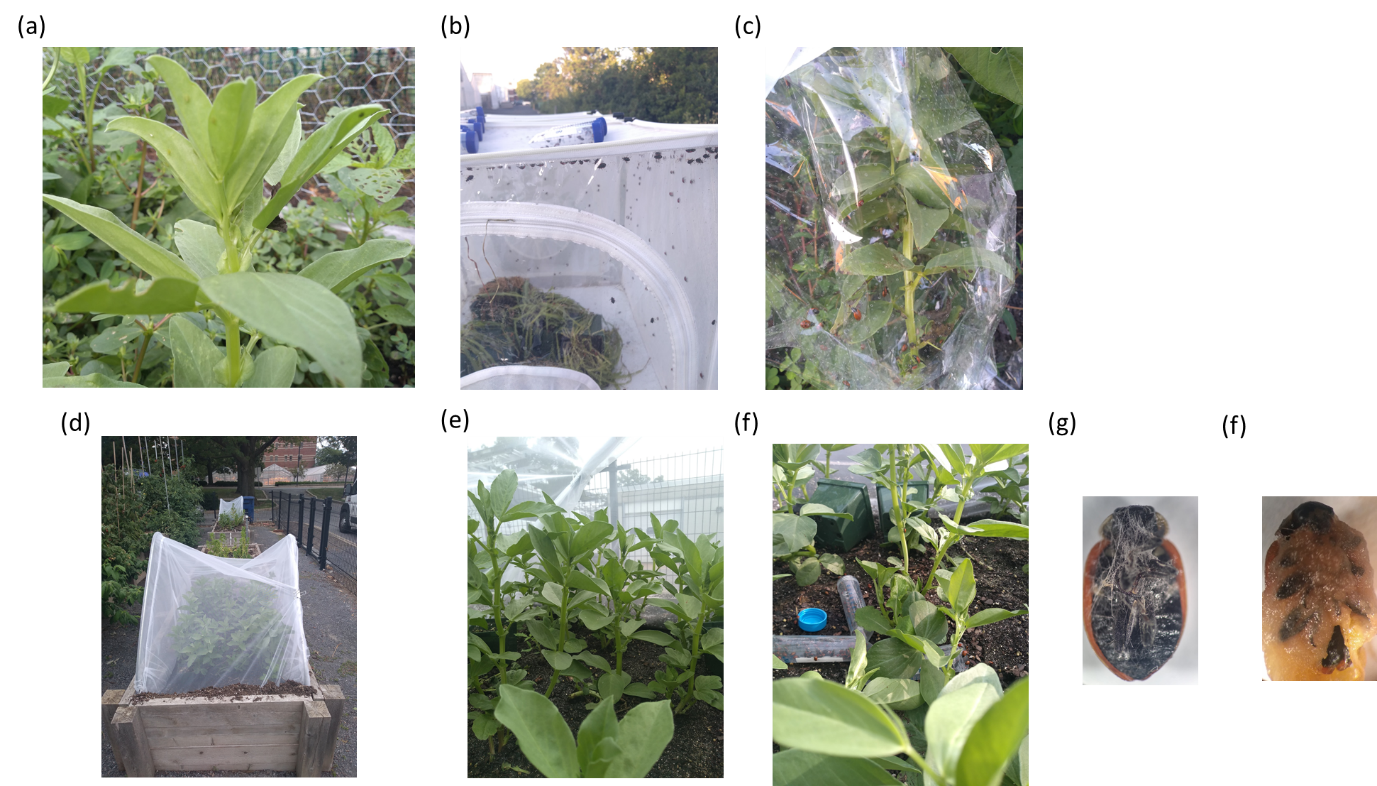
**

**Figure S1.** Experimental microcosmstesting the effects fungal infections on the thermal tolerance and volunteer exposure to extreme temperatures of prey and predator insect species. Colonies and experiments under field conditions (a) *Acyrthociphom pisum* and (b-c) *Hippodamia convergens*. (d-f) Experimental microcosmsto evaluate two fungal loads: low spore load= 1.4 x 10 6spores ha-1, high spore load = 1.4 x 1012 spores ha-1. (g-f) *Hippodamia convergens* adults infected with (g) low and (f) high fungal loads.

**Table S1** Spores on experimental individuals of *Acyrtociphom pisum* and *Hippodamia convergens* subject thermal conditions (CTMax, CTMin, voluntary exposure to warm or cold ETZs (Mean ±s.e.)

| **Treatment** | **Spores (Mean ±s.e.)** | | | | | | |
| --- | --- | --- | --- | --- | --- | --- | --- |
| ***Acyrtocyphon pisum*** | | | **CTMax** | **CTMin** | **Exploration** | **Warm ETZ** | **Cold ETZ** |
| **Healthy** | | | 0.16 ± 0.09 | 0.5 2± 0.15 | 0 | 0.2 ± 0.10 | 0.54 ±0.14 |
| **Low fungal load** | | 6.37 ± 0.68 | | 0.95 ± 0.27 | 10.7 ± 0.74 | 1.08 ± 0.25 | 8.04 ±0.86 |
| **High fungal load** | | 11.33± 0.85 | | 25.5 ± 2.01 | 23.25 ± 0.97 | 6.79 ± 0.95 | 16.5 ±0.98 |

| ***Hippodamia convergens***  **Healthy** | 0.125 ± 0.06 | 0.04 ± 0.06 | 0.04 ± 0.04 | 0.41 ± 0.28 | 0.04 ± 0.04 |
| --- | --- | --- | --- | --- | --- |
| **Low fungal load** | 7.33 ± 1.09 | 22.37 ± 1.28 | 13.75 ± 1.3 | 3.37 ± 0.87 | 13.75 ± 1.12 |
| **High fungal load** | 24.83 ± 1.45 | 23.41 ± 1.42 | 14.95 ± 1.78 | 12.58 ± 0.89 | 14.95 ± 0.91 |

**Table S2**. Parameter estimatesof analysis of deviance (type II) tables of full-factorial models from experiments testing the effect fungal infections and exposure to critical and extreme temperatures on *A. pisum* (AIC=226.59)

| **Term** | **Estimate** | **Std Error** | **L-R χ2** | **Prob> χ2** | **Lower CL** | **Upper CL** |
| --- | --- | --- | --- | --- | --- | --- |
| Intercept | 1.6783181 | 0.1812863 | 47.997587 | <.0001* | 1.3001056 | 2.0158612 |
| Treatment[Healthy] | 1.2474324 | 0.1837697 | 57.752738 | <.0001* | 0.903057 | 1.6290838 |
| Treatment[High load] | -0.849709 | 0.2748498 | 12.158488 | 0.0005* | -1.446586 | -0.351222 |
| Exp[control no therm] | 0.4719357 | 0.8862827 | 0.2815829 | 0.5957 | -1.301294 | 2.2213609 |
| Exp[Ctmax] | -0.621031 | 0.3897594 | 3.319932 | 0.0684 | -1.631974 | 0.042479 |
| Exp[Ctmin] | -0.182522 | 0.2626325 | 0.4881446 | 0.4848 | -0.712676 | 0.3279798 |
| Exp[vtmax] | 0.3670305 | 0.2199004 | 2.859498 | 0.0908 | -0.057837 | 0.8099065 |
| Exp[Vtmin] | 0.0186885 | 0.121194 | 0.0236617 | 0.8777 | -0.226755 | 0.2492391 |
| Exp[control no therm]*Treatment[Healthy] | -0.435855 | 0.8784206 | 0.2445187 | 0.6210 | -2.16945 | 1.3235993 |
| Exp[control no therm]*Treatment[High load] | 0.8466504 | 1.3705212 | 0.3777615 | 0.5388 | -1.931149 | 3.6352916 |
| Exp[Ctmax]*Treatment[Healthy] | 0.4253094 | 0.403089 | 1.3193899 | 0.2507 | -0.271528 | 1.4509115 |
| Exp[Ctmax]*Treatment[High load] | -1.306191 | 0.7282436 | 4.7250835 | 0.0297* | -3.274048 | -0.113369 |
| Exp[Ctmin]*Treatment[Healthy] | 0.2525042 | 0.2780105 | 0.8337313 | 0.3612 | -0.288591 | 0.8107999 |
| Exp[Ctmin]*Treatment[High load] | -0.135261 | 0.4244667 | 0.1022222 | 0.7492 | -1.005281 | 0.6933132 |
| Exp[vtmax]*Treatment[Healthy] | -0.297049 | 0.2380549 | 1.5846084 | 0.2081 | -0.773954 | 0.1639418 |
| Exp[vtmax]*Treatment[High load] | 0.2706972 | 0.3442771 | 0.6324496 | 0.4265 | -0.390072 | 0.9775987 |
| Exp[Vtmin]*Treatment[Healthy] | 0 | . | . | . | . | . |
| Exp[Vtmin]*Treatment[High load] | 0 | . | . | . | . | . |

**Table S3**. Parameter estimatesof analysis of deviance (type II) tables of full-factorial models from experiments testing the effect fungal infections and exposure to critical and extreme temperatures on *H. convergens* (AICc=268.44).

| **Term** | **Estimate** | **Std Error** | **L-R χ2** | **Prob> χ2** | **Lower CL** | **Upper CL** |
| --- | --- | --- | --- | --- | --- | --- |
| Intercept | 2.1227029 | 0.1427327 | 105.80056 | <.0001* | 1.8297187 | 2.3918986 |
| Treatment[Healthy] | 1.1072119 | 0.1447328 | 69.552011 | <.0001* | 0.8326525 | 1.4030131 |
| Treatment[High load] | -0.87692 | 0.2169883 | 21.507157 | <.0001* | -1.338942 | -0.479615 |
| Exp[control no therm] | -0.614136 | 0.6546677 | 0.8981856 | 0.3433 | -1.932339 | 0.6443899 |
| Exp[Ctmax] | 0.2700986 | 0.1782733 | 2.3129418 | 0.1283 | -0.077972 | 0.6242407 |
| Exp[Ctmin] | 0.5026324 | 0.168515 | 9.2306397 | 0.0024* | 0.1769253 | 0.8403538 |
| Exp[vtmax] | 0.2330704 | 0.1761357 | 1.771915 | 0.1831 | -0.109584 | 0.5838873 |
| Exp[Vtmin] | 0.0534996 | 0.1026458 | 0.2679036 | 0.6047 | -0.153211 | 0.2497109 |
| Exp[control no therm]*Treatment[Healthy] | 0.6676359 | 0.6473095 | 1.0896016 | 0.2966 | -0.57483 | 1.9730426 |
| Exp[control no therm]*Treatment[High load] | -0.321543 | 0.9668145 | 0.1124888 | 0.7373 | -2.331409 | 1.4939472 |
| Exp[Ctmax]*Treatment[Healthy] | -0.229178 | 0.1948902 | 1.3915994 | 0.2381 | -0.615347 | 0.1513134 |
| Exp[Ctmax]*Treatment[High load] | 0.0245631 | 0.2893245 | 0.0072149 | 0.9323 | -0.541167 | 0.6042516 |
| Exp[Ctmin]*Treatment[Healthy] | -0.461712 | 0.1860058 | 6.331376 | 0.0119* | -0.832673 | -0.101268 |
| Exp[Ctmin]*Treatment[High load] | 0.1487042 | 0.2705213 | 0.3064098 | 0.5799 | -0.371623 | 0.6983828 |
| Exp[vtmax]*Treatment[Healthy] | -0.327491 | 0.1950384 | 2.8559736 | 0.0910 | -0.714817 | 0.0520809 |
| Exp[vtmax]*Treatment[High load] | 0.2557473 | 0.2809862 | 0.8412902 | 0.3590 | -0.288407 | 0.8229832 |
| Exp[Vtmin]*Treatment[Healthy] | 0 | . | . | . | . | . |
| Exp[Vtmin]*Treatment[High load] | 0 | . | . | . | . | . |
